# Supplementary material for: Prediction of Drug-Drug Interactions with Bupropion and Its Metabolites as CYP2D6 Inhibitors Using a Physiologically-Based Pharmacokinetic Model
Source: MDPI journal article supplement (doi:10.3390/pharmaceutics10010001), 2017-12-21
Supplement: s1 [file s1]

# Supplementary Materials: Prediction of Drug-Drug Interactions with Bupropion and Its Metabolites as CYP2D6 Inhibitors Using a Physiologically-Based Pharmacokinetic Model

Caifu Xue, Xunjie Zhang and Weimin Cai \*

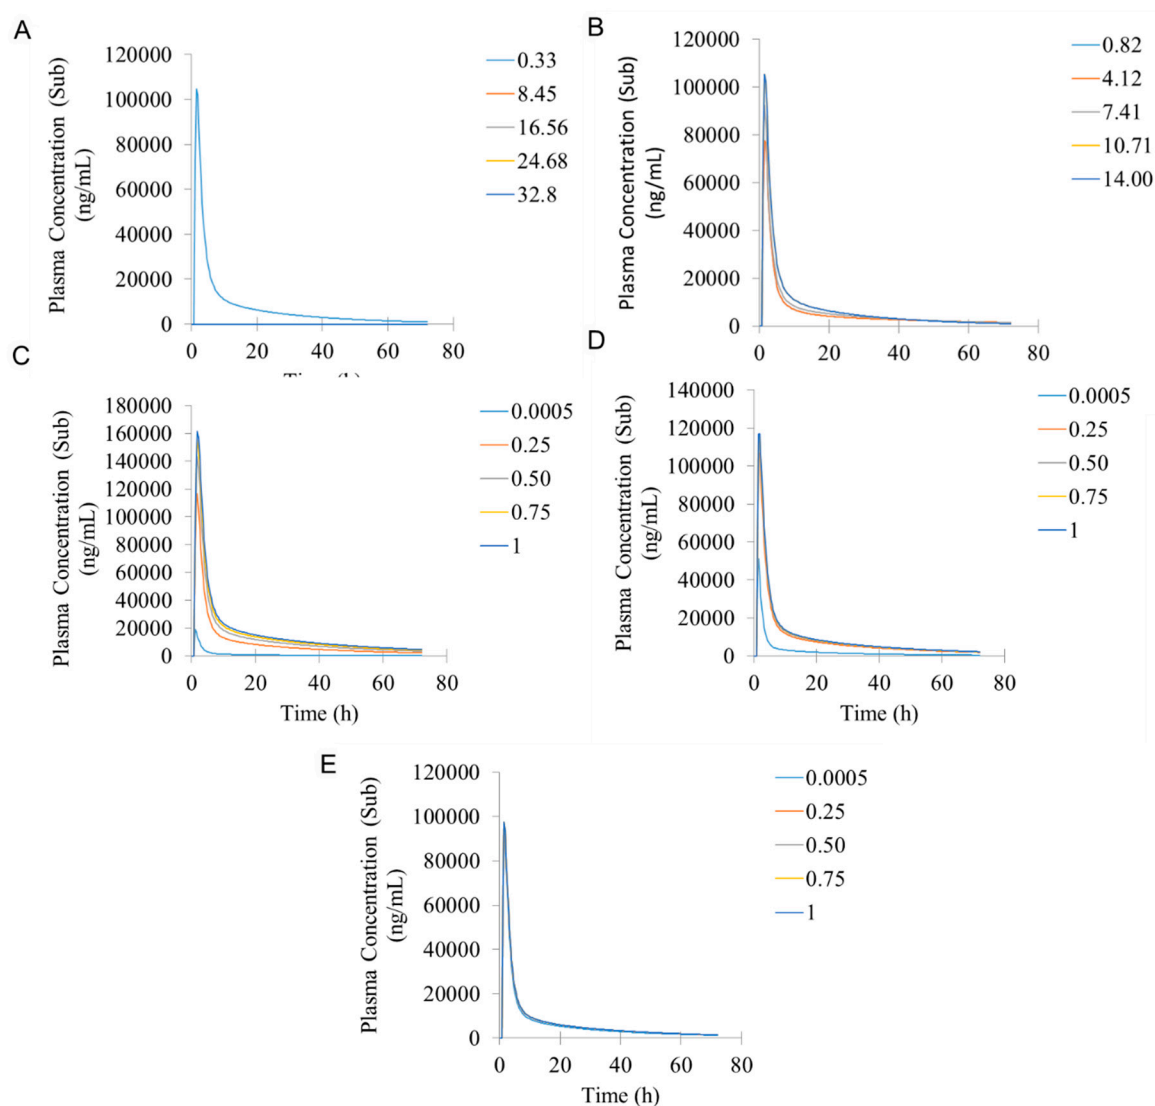

**Figure S1.** Sensitivity analysis results expressed as plasma concentration-time profiles from Simcyp PBPK model simulations: (A) logP; (B) pKa; (C)  $f_{u,mic}$  for formation of hydroxybupropion, (D)  $f_{u,mic}$  for formation of threohydrobupropion, (E)  $f_{u,mic}$  for formation of erythrohydrobupropion. The parameter ranges assessed were logP, 0.33–32.8, pKa, 0.82–14.00,  $f_{u,mic}$ , 0.0005–1.
